# Supplementary material
Source: MDPI journal article supplement (https://www.mdpi.com/2410-3888/2/2/7)
Supplement: s1 [file s1]

**Supplementary Materials**

**Assessment of *Urochloa mutica* expansion and invasion potential in Waiakea PFA and Wailoa River in Hilo, Hawaii USA**

*U. mutica expansion rates*

A total of 16.9 ha of estuarine waters and an encompassing 4.7 km of bank was surveyed and mapped for *U. mutica* cover at the survey site. In Waiakea PFA, characterized by shallow pond habitat, *U. mutica* cover gradually increased from 1.26 ha in April 2013 to 1.75 ha in April 2014 (Table S1, Figure S1). In Wailoa River, characterized by deeper estuarine river habitat, *U. mutica* increased from no cover in April 2013 to 0.39 ha in November 2013, and then decreased to 0.34 ha in April 2014 (Table S1, Figure S1). The spatial distribution of *U. mutica* also changed between November 2013 and April 2014 as a large floating mat (400 m2) broke free and moved towards the middle of Waiakea PFA until it snagged on a large submerged tree branch, preventing it from drifting further downstream into Wailoa River (Figure S1D). For both habitats, expansion rates were considerably higher in the time period between April and November 2013 (19.1 and 17.3 m2 day-1 in Waiakea PFA and Wailoa River, respectively) than the time period between November 2013 and April 2014 (Table S1).

**Table S1.** *Urochloa mutica* cover and expansion rates in Waiakea Public Fishing Area (PFA) and Wailoa River by date. 1 ha = 1 × 104 m2.

|  | Waiakea PFA | |  | Wailoa River | | | | |  | Total | |
| --- | --- | --- | --- | --- | --- | --- | --- | --- | --- | --- | --- |
| Date | Cover (ha) | Expansion Rate (m2 day-1) |  | Cover (ha) | | Expansion Rate (m2 day-1) | |  | | Cover (ha) | Expansion Rate (m2 day-1) |
| 4/15/13 | 1.26 | — |  | 0 | — | |  | | | 1.26 | — |
| 11/26/13 | 1.69 | 19.1 |  | 0.39 | 17.3 | |  | | | 2.07 | 36.0 |
| 4/24/14 | 1.75 | 4.2 |  | 0.34 | -3.2 | |  | | | 2.09 | 1.3 |


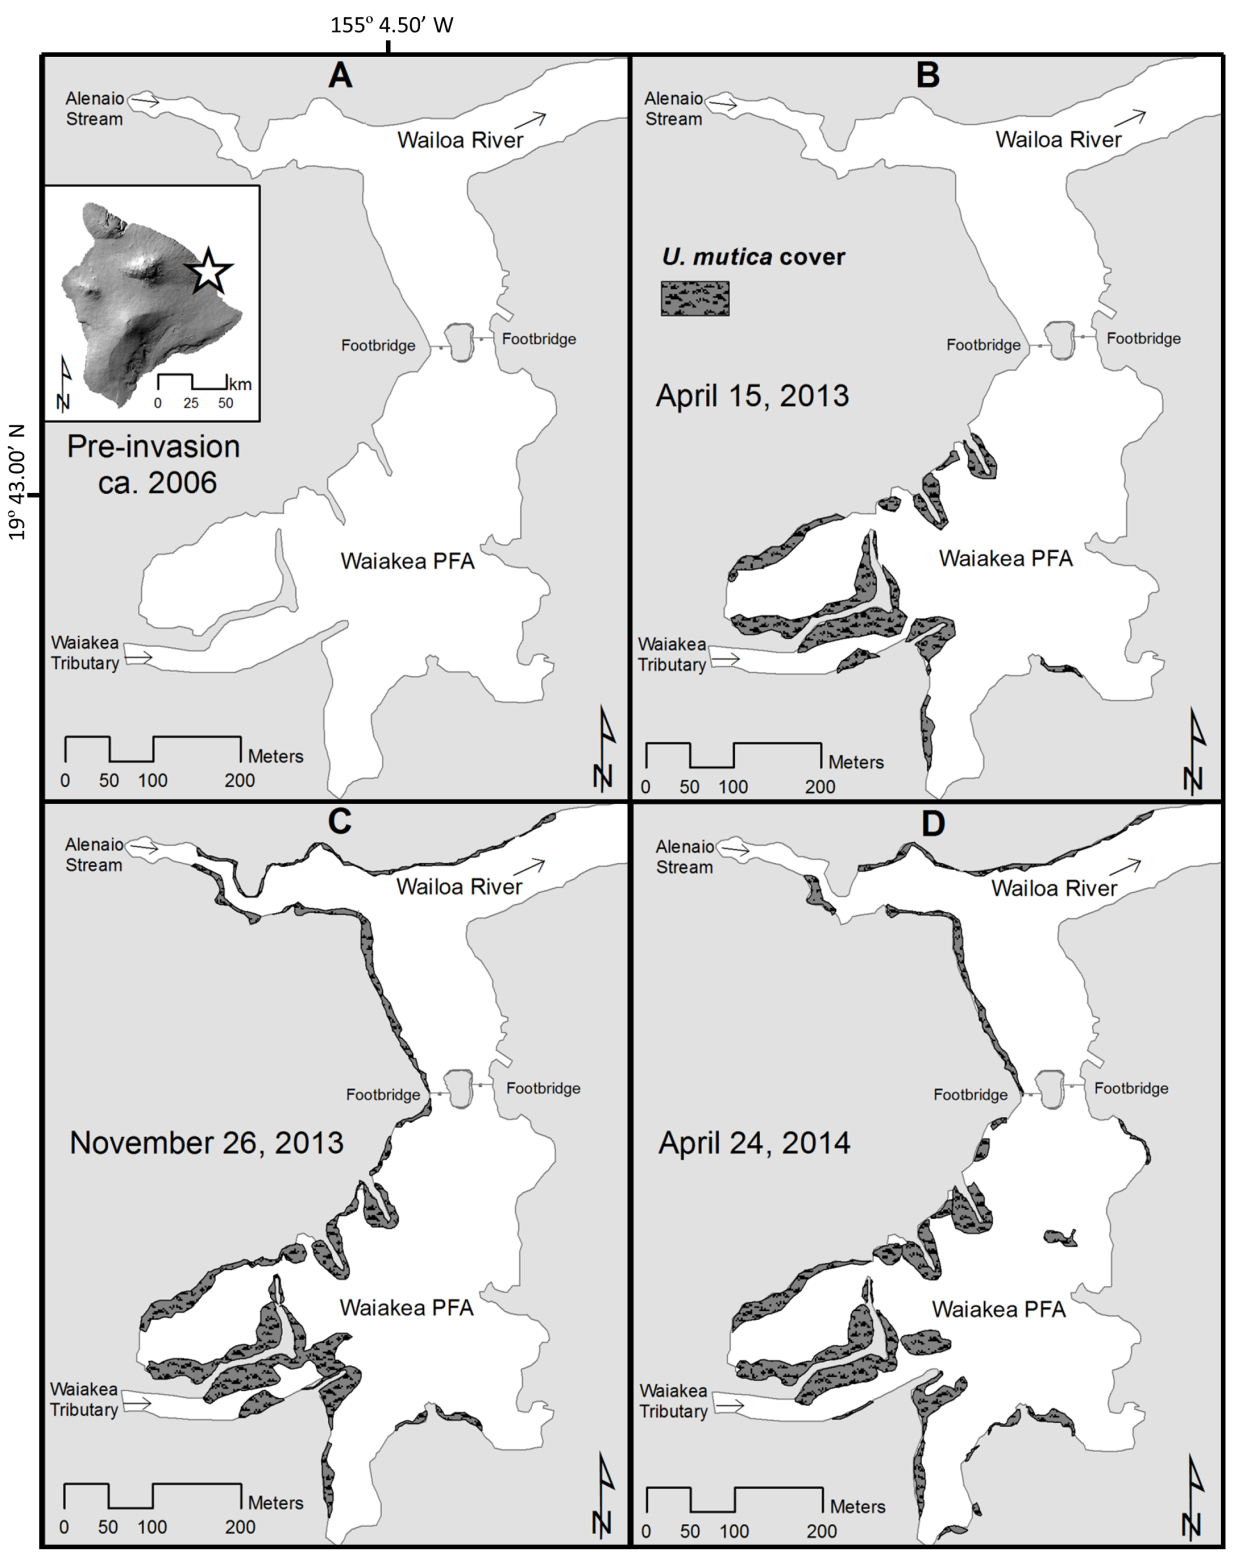


**Figure S1.** Maps of Waiakea PFA and Wailoa River prior to *Urochloa mutica* invasion, and *U. mutica* areal coverage across three dates; A) Pre-invasion ca. 2006, B) April 15, 2013, C) November 26, 2013 and D) April 24, 2014.

*U. mutica* cover declined rapidly with increasing water depth, with 63% of total *U. mutica* cover (1.3 ha) recorded in ≤ 0.7 m water depths, the next 36% (0.76 ha) between 0.8–1.8 m, and the last 1% (0.02 ha) recorded between 2.0–2.2 m. No cover was recorded at > 2.3 m depths (Figure S2). Based on this negative relationship, we designated the invasion potential gradient as “highest risk” starting from the shallowest habitat (< 0.2 m) to “lowest risk” in the deepest habitat (≥ 2.2 m). When referencing the invasion potential gradient, the shallower half of the gradient (< 0.2 m to 1.2 m) was regarded as “relative higher risk”, whereas the deeper half of the gradient (> 1.2 m to ≥ 2.2 m) was regarded as “relative lower risk”.


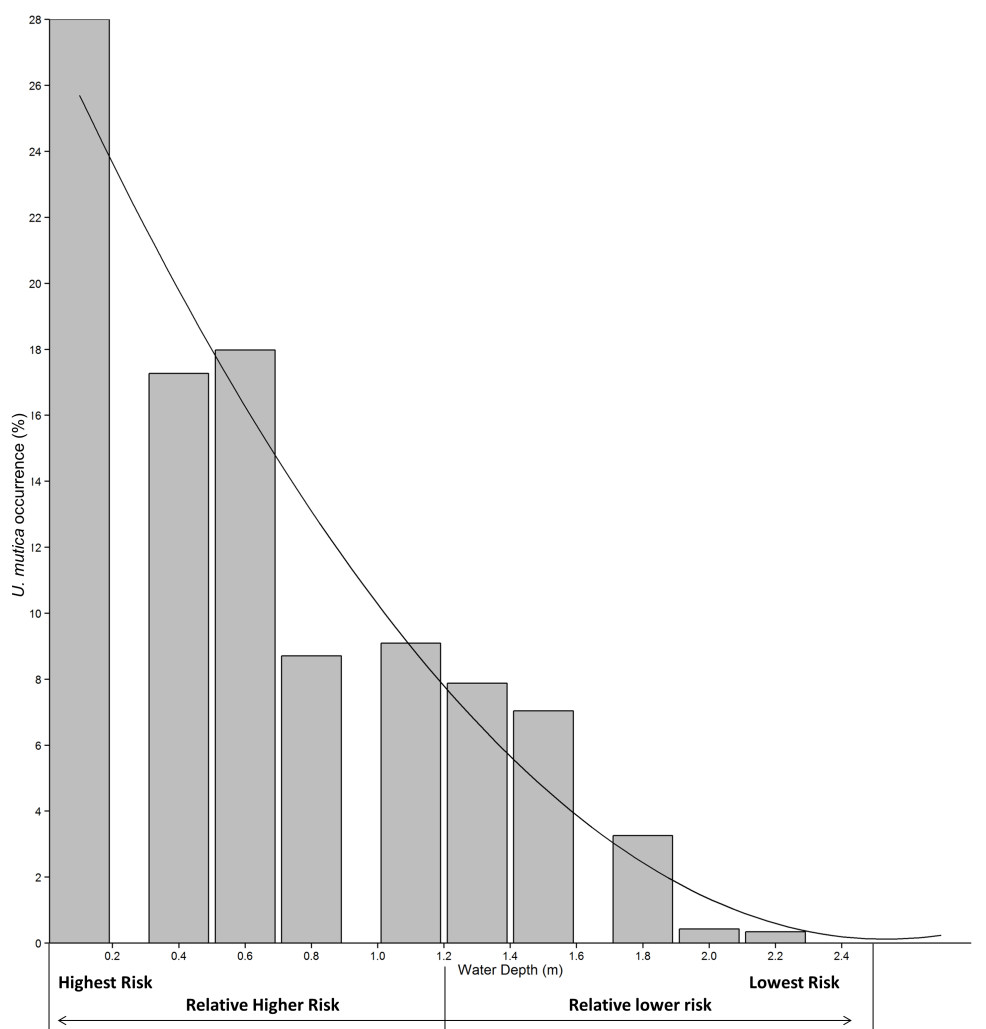


**Figure S2.** Percent (%) distribution of total *Urochloa mutica* cover vs. water depth (m) in Waiakea PFA and Wailoa River. Invasion potential gradient (“Highest Risk” to “Lowest Risk”) and binary classification (“Relative higher risk” and “Relative lower risk”) are aligned with water depth along x axis. Solid line is a best-fit 2nd order polynomial curve. *R*2 = 0.9506; y = 904.68x2 – 4580.2x + 5822.3.

Across the entire study site, 62% (10.4 ha) was within “relative higher risk” of *U. mutica* invasion. Of that total, 13% (1.38 ha) was already invaded by *U. mutica*. In Waiakea PFA,68% of the water body (7.7 ha) was within “relative higher risk”, while 49% (2.7 ha) of Wailoa River was in “relative higher risk” of *U. mutica* invasion.
